# Supplementary material for: Blood pressure and complications in individuals with type 2 diabetes and no previous cardiovascular disease: national population based cohort study
Source: PubMed Central journal article supplement — BMJ. 2016 Aug 4;354:i4070. doi: 10.1136/bmj.i4070 (PMC4975020; doi:10.1136/bmj.i4070), 2016-08-04
Supplement: adas033440.ww1_default.pdf [file adas033440.ww1_default.pdf]

## Supplementary appendix [posted as supplied by author]

Supplement to the study “Blood Pressure and Complications in Individuals with Type 2 Diabetes and No Previous Cardiovascular Disease: national population based cohort study”

### Table of contents

|                                                                                                     |    |
|-----------------------------------------------------------------------------------------------------|----|
| Baseline characteristics of the study population including individuals with previous diseases ..... | 2  |
| Results from Cox regression models for all studied endpoints.....                                   | 5  |
| Frequencies of primary causes of death in different systolic blood pressure groups .....            | 18 |
| Drugs as covariates and interaction terms.....                                                      | 20 |
| Drugs included in Cox regression model as a covariate for medication for heart disease .....        | 27 |
| Treatment intensity at the care unit level.....                                                     | 28 |

Table A. Baseline characteristics of the total population including individuals with previous diseases, n=265,638

| <b>Characteristics</b>        | <b>110-119 mmHg<br/>(n=19 254)</b> | <b>120-129 mmHg<br/>(n=52 597)</b> | <b>130-139 mmHg<br/>(n=69 949)</b> | <b>140-149 mmHg<br/>(n=61 445)</b> | <b>150-159 mmHg<br/>(n=30 249)</b> | <b>&gt;=160 mmHg<br/>(n=32 144)</b> | <b>Missing</b> |
|-------------------------------|------------------------------------|------------------------------------|------------------------------------|------------------------------------|------------------------------------|-------------------------------------|----------------|
| Systolic blood pressure, mmHg | 112.9 (3.0)                        | 122.6 (2.9)                        | 132.3 (2.8)                        | 141.8 (2.6)                        | 151.7 (2.6)                        | 168.1 (10.7)                        |                |
| Male                          | 10959 (56.9%)                      | 31719 (60.3%)                      | 42604 (60.9%)                      | 36771 (59.8%)                      | 17998 (59.5%)                      | 18479 (57.5%)                       |                |
| Age                           | 57.6 (11.3)                        | 59.7 (10.1)                        | 61.7 (9.2)                         | 63.0 (8.4)                         | 63.7 (8.1)                         | 64.6 (7.7)                          |                |
| Duration of diabetes, years   | 5.3 (6.0)                          | 5.5 (6.1)                          | 5.9 (6.2)                          | 6.3 (6.4)                          | 6.6 (6.5)                          | 7.1 (6.8)                           |                |
| HbA1c, mmol/mol               | 52.0 (13.5)                        | 52.5 (13.3)                        | 52.8 (12.9)                        | 53.6 (13.3)                        | 54.2 (13.6)                        | 55.3 (14.5)                         | 12660 (4.8%)   |
| Diet treatment only           | 5912 (30.7%)                       | 15154 (28.8%)                      | 20109 (28.7%)                      | 17238 (28.1%)                      | 8352 (27.6%)                       | 8337 (25.9%)                        |                |
| Tablet treatment only         | 8965 (46.6%)                       | 25603 (48.7%)                      | 33896 (48.5%)                      | 29358 (47.8%)                      | 14193 (46.9%)                      | 14833 (46.1%)                       |                |
| Insulin treatment             | 2268 (11.8%)                       | 5605 (10.7%)                       | 6958 (9.9%)                        | 6009 (9.8%)                        | 3118 (10.3%)                       | 3833 (11.9%)                        |                |
| Insulin and tablet treatment  | 2109 (11.0%)                       | 6235 (11.9%)                       | 8986 (12.8%)                       | 8840 (14.4%)                       | 4586 (15.2%)                       | 5141 (16.0%)                        |                |
| BMI, kg/m <sup>2</sup>        | 29.6 (5.5)                         | 30.0 (5.4)                         | 30.3 (5.3)                         | 30.5 (5.4)                         | 30.6 (5.4)                         | 30.5 (5.4)                          | 38760 (14.6%)  |
| LDL, mmol/l                   | 2.7 (0.9)                          | 2.8 (0.9)                          | 2.8 (0.9)                          | 2.8 (0.9)                          | 2.8 (0.9)                          | 2.9 (1.0)                           | 92192 (34.7%)  |
| HDL, mmol/l                   | 1.3 (0.4)                          | 1.3 (0.4)                          | 1.3 (0.4)                          | 1.3 (0.4)                          | 1.3 (0.4)                          | 1.3 (0.4)                           | 86207 (32.5%)  |
| Cholesterol, mmol/l           | 4.8 (1.1)                          | 4.8 (1.0)                          | 4.9 (1.0)                          | 4.9 (1.0)                          | 5.0 (1.1)                          | 5.1 (1.1)                           | 63853 (24.0%)  |
| Triglycerides, mmol/l         | 1.8 (1.2)                          | 1.9 (1.2)                          | 1.9 (1.2)                          | 1.9 (1.2)                          | 1.9 (1.2)                          | 2.0 (1.2)                           | 84096 (31.7%)  |
| Microalbuminuria              | 1553 (12.0%)                       | 4656 (12.9%)                       | 6927 (14.3%)                       | 6875 (16.4%)                       | 3802 (18.3%)                       | 4706 (21.7%)                        | 83626 (31.5%)  |
| Macroalbuminuria              | 725 (5.6%)                         | 2035 (5.6%)                        | 2954 (6.1%)                        | 3049 (7.3%)                        | 1897 (9.2%)                        | 2558 (11.8%)                        |                |

| <b>Characteristics</b>           | <b>110-119 mmHg<br/>(n=19 254)</b> | <b>120-129 mmHg<br/>(n=52 597)</b> | <b>130-139 mmHg<br/>(n=69 949)</b> | <b>140-149 mmHg<br/>(n=61 445)</b> | <b>150-159 mmHg<br/>(n=30 249)</b> | <b>&gt;=160 mmHg<br/>(n=32 144)</b> | <b>Missing</b> |
|----------------------------------|------------------------------------|------------------------------------|------------------------------------|------------------------------------|------------------------------------|-------------------------------------|----------------|
| eGFR, ml/min/1.73 m <sup>2</sup> | 86.6 (25.5)                        | 86.5 (24.5)                        | 85.3 (23.1)                        | 84.6 (23.4)                        | 84.0 (23.8)                        | 82.9 (25.5)                         | 45659 (17.2%)  |
| Current smoker                   | 3407 (20.6%)                       | 8458 (18.6%)                       | 10370 (17.2%)                      | 8651 (16.5%)                       | 4336 (16.9%)                       | 4953 (18.2%)                        | 38157 (14.4%)  |
| Previous AMI                     | 1737 (9.0%)                        | 3908 (7.4%)                        | 4447 (6.4%)                        | 3597 (5.9%)                        | 1649 (5.5%)                        | 1765 (5.5%)                         |                |
| Previous stroke                  | 820 (4.3%)                         | 2173 (4.1%)                        | 2892 (4.1%)                        | 2607 (4.2%)                        | 1306 (4.3%)                        | 1581 (4.9%)                         |                |
| Previous CVD                     | 2435 (12.6%)                       | 5802 (11.0%)                       | 7022 (10.0%)                       | 5917 (9.6%)                        | 2837 (9.4%)                        | 3204 (10.0%)                        |                |
| Previous CHD                     | 3238 (16.8%)                       | 7740 (14.7%)                       | 9381 (13.4%)                       | 7919 (12.9%)                       | 3691 (12.2%)                       | 4066 (12.6%)                        |                |
| Previous amputation              | 53 (0.3%)                          | 141 (0.3%)                         | 169 (0.2%)                         | 177 (0.3%)                         | 98 (0.3%)                          | 157 (0.5%)                          |                |
| Previous heart failure           | 1421 (7.4%)                        | 2456 (4.7%)                        | 2434 (3.5%)                        | 1974 (3.2%)                        | 942 (3.1%)                         | 992 (3.1%)                          |                |
| Previous atrial fibrillation     | 1414 (7.3%)                        | 2788 (5.3%)                        | 3384 (4.8%)                        | 2817 (4.6%)                        | 1300 (4.3%)                        | 1350 (4.2%)                         |                |
| Previous renal disease           | 63 (0.3%)                          | 130 (0.2%)                         | 136 (0.2%)                         | 100 (0.2%)                         | 63 (0.2%)                          | 62 (0.2%)                           |                |
| Previous dementia                | 56 (0.3%)                          | 96 (0.2%)                          | 110 (0.2%)                         | 87 (0.1%)                          | 42 (0.1%)                          | 49 (0.2%)                           |                |
| Previous cancer                  | 693 (3.6%)                         | 1856 (3.5%)                        | 2538 (3.6%)                        | 2234 (3.6%)                        | 1094 (3.6%)                        | 1130 (3.5%)                         |                |
| Thiazide diuretics               | 2500 (13.0%)                       | 8847 (16.8%)                       | 14281 (20.4%)                      | 13876 (22.6%)                      | 7251 (24.0%)                       | 8155 (25.4%)                        |                |
| Loop diuretics                   | 2465 (12.8%)                       | 5325 (10.1%)                       | 6659 (9.5%)                        | 6293 (10.2%)                       | 3368 (11.1%)                       | 3938 (12.3%)                        |                |
| Calcium antagonists              | 2397 (12.4%)                       | 8946 (17.0%)                       | 14954 (21.4%)                      | 15077 (24.5%)                      | 8204 (27.1%)                       | 9024 (28.1%)                        |                |
| Spirolactone                     | 1017 (5.3%)                        | 1932 (3.7%)                        | 2018 (2.9%)                        | 1659 (2.7%)                        | 799 (2.6%)                         | 778 (2.4%)                          |                |
| B-blockers                       | 5781 (30.0%)                       | 15995 (30.4%)                      | 22529 (32.2%)                      | 21376 (34.8%)                      | 11317 (37.4%)                      | 13460 (41.9%)                       |                |
| RAAS-blockers                    | 6770 (35.2%)                       | 21368 (40.6%)                      | 32807 (46.9%)                      | 31424 (51.1%)                      | 17042 (56.3%)                      | 19514 (60.7%)                       |                |

| <b>Characteristics</b>            | <b>110-119 mmHg<br/>(n=19 254)</b> | <b>120-129 mmHg<br/>(n=52 597)</b> | <b>130-139 mmHg<br/>(n=69 949)</b> | <b>140-149 mmHg<br/>(n=61 445)</b> | <b>150-159 mmHg<br/>(n=30 249)</b> | <b>&gt;=160 mmHg<br/>(n=32 144)</b> | <b>Missing</b> |
|-----------------------------------|------------------------------------|------------------------------------|------------------------------------|------------------------------------|------------------------------------|-------------------------------------|----------------|
| Number of antihypertensive agents | 1.1 (1.3)                          | 1.2 (1.3)                          | 1.4 (1.3)                          | 1.5 (1.3)                          | 1.6 (1.3)                          | 1.8 (1.4)                           |                |
| Medication for heart disease      | 2468 (12.8%)                       | 5609 (10.7%)                       | 6705 (9.6%)                        | 5687 (9.3%)                        | 2809 (9.3%)                        | 2927 (9.1%)                         |                |
| Statins                           | 7972 (41.4%)                       | 23281 (44.3%)                      | 31748 (45.4%)                      | 27171 (44.2%)                      | 13019 (43.0%)                      | 13407 (41.7%)                       |                |

Data are presented as mean ( $\pm$ SD) or count (%).

## Results from Cox regression models for all studied endpoints

Three models were tested. The first model included all individuals, even those with previous diseases (n=265,638). The second and third models included only individuals who did not have a history of cancer, coronary heart disease (CHD), cardiovascular disease (CVD), heart failure, atrial fibrillation, end stage renal disease, amputation or dementia at baseline (n=187,106). The models were adjusted for the following variables: age, gender, diabetes duration, type of diabetes treatment, HbA1c, smoking status, LDL cholesterol, HDL cholesterol, triglycerides, microalbuminuria, and macroalbuminuria. BMI and eGFR were used as categorical variables because of their nonlinear relationship with mortality. The third model was also adjusted for thiazide diuretics, loop diuretics, calcium antagonists, spironolactone,  $\beta$ -blockers, and medication for heart disease. As a covariate of treatment intensity at the care unit, the percentage of patients receiving a combination of a thiazide diuretic, calcium antagonist and either a renin-angiotensin system inhibitor or angiotensin II blocker (RAAS blocking agent) was used. The following variables were entered as continuous variables: age, HbA1c, LDL-cholesterol, HDL-cholesterol, and triglycerides. The following variables were entered as categorical variables: systolic blood pressure, gender, smoking, microalbuminuria, macroalbuminuria, diabetes treatment, BMI, eGFR, loop diuretics, calcium antagonists, treatment intensity at the care unit. The following variables were included with an interaction term with systolic blood pressure: calcium antagonists, spironolactone, and  $\beta$ -blockers.

Table B. Hazard-ratios for covariates included in the fully adjusted regression model, endpoint: nonfatal cardiovascular disease (CVD)

| <b>Variable</b>                                                      | <b>Hazard ratio (95% confidence interval)</b> | <b>p-value</b> |
|----------------------------------------------------------------------|-----------------------------------------------|----------------|
| 110-119 mmHg                                                         | 0.82 (0.72 to 0.93)                           | 0.002          |
| 120-129 mmHg                                                         | 0.92 (0.84 to 0.99)                           | 0.04           |
| 140-149 mmHg                                                         | 1.08 (1.00 to 1.16)                           | 0.05           |
| 150-159 mmHg                                                         | 1.22 (1.12 to 1.33)                           | <0.001         |
| ≥160 mmHg                                                            | 1.37 (1.27 to 1.49)                           | <0.001         |
| Age (years)                                                          | 1.06 (1.06 to 1.06)                           | <0.001         |
| Male (vs. female)                                                    | 1.51 (1.44 to 1.57)                           | <0.001         |
| Diabetes duration, per year                                          | 1.02 (1.01 to 1.02)                           | <0.001         |
| Smoking (yes vs. no)                                                 | 1.58 (1.50 to 1.66)                           | <0.001         |
| HbA1c, per mmol/mol                                                  | 1.01 (1.01 to 1.01)                           | <0.001         |
| LDL-cholesterol, per mmol/l                                          | 1.17 (1.14 to 1.19)                           | <0.001         |
| HDL-cholesterol, per mmol/l                                          | 0.90 (0.85 to 0.96)                           | <0.001         |
| Triglycerides, per mmol/l                                            | 1.08 (1.06 to 1.10)                           | <0.001         |
| Microalbuminuria                                                     | 1.23 (1.17 to 1.30)                           | <0.001         |
| Macroalbuminuria                                                     | 1.41 (1.31 to 1.52)                           | <0.001         |
| Tablet diabetes treatment only (vs. diet treatment only)             | 1.14 (1.08 to 1.20)                           | <0.001         |
| Insulin diabetes treatment only (vs. diet treatment only)            | 1.27 (1.18 to 1.36)                           | <0.001         |
| Tablet & insulin treatment (vs. diet treatment only)                 | 1.33 (1.25 to 1.42)                           | <0.001         |
| BMI, 18.1-19 kg/m <sup>2</sup> (vs. BMI, 22.1-23 kg/m <sup>2</sup> ) | 0.98 (0.67 to 1.44)                           | 0.94           |
| BMI, 19.1-20 kg/m <sup>2</sup> (vs. BMI, 22.1-23 kg/m <sup>2</sup> ) | 1.06 (0.77 to 1.45)                           | 0.73           |
| BMI, 20.1-21 kg/m <sup>2</sup> (vs. BMI, 22.1-23 kg/m <sup>2</sup> ) | 1.17 (0.93 to 1.48)                           | 0.18           |
| BMI, 21.1-22 kg/m <sup>2</sup> (vs. BMI, 22.1-23 kg/m <sup>2</sup> ) | 0.91 (0.74 to 1.13)                           | 0.41           |
| BMI, 23.1-24 kg/m <sup>2</sup> (vs. BMI, 22.1-23 kg/m <sup>2</sup> ) | 0.94 (0.80 to 1.11)                           | 0.46           |
| BMI, 24.1-25 kg/m <sup>2</sup> (vs. BMI, 22.1-23 kg/m <sup>2</sup> ) | 0.92 (0.78 to 1.09)                           | 0.34           |
| BMI, 25.1-30 kg/m <sup>2</sup> (vs. BMI, 22.1-23 kg/m <sup>2</sup> ) | 0.96 (0.83 to 1.11)                           | 0.59           |
| BMI, 30.1-35 kg/m <sup>2</sup> (vs. BMI, 22.1-23 kg/m <sup>2</sup> ) | 0.94 (0.81 to 1.08)                           | 0.37           |
| BMI, >35 kg/m <sup>2</sup> (vs. BMI, 22.1-23 kg/m <sup>2</sup> )     | 0.91 (0.78 to 1.06)                           | 0.22           |
| GFR ≥50 ml/min/1.73 m <sup>2</sup>                                   | 1.29 (1.17 to 1.41)                           | <0.001         |
| Thiazide diuretics (yes vs. no)                                      | 0.94 (0.85 to 1.04)                           | 0.24           |
| Loop diuretics (yes vs. no)                                          | 1.15 (1.08 to 1.22)                           | <0.001         |
| Calcium channel blockers (yes vs. no)                                | 1.28 (1.16 to 1.41)                           | <0.001         |
| Spironolactone (yes vs. no)                                          | 1.26 (1.00 to 1.60)                           | 0.05           |
| Beta blockers (yes vs. no)                                           | 1.10 (1.01 to 1.21)                           | 0.03           |
| Treatment intensity at the care unit                                 | 0.87 (0.82 to 0.91)                           | <0.001         |

| <b>Variable</b>                                                | <b>Hazard ratio (95% confidence interval)</b> | <b>p-value</b> |
|----------------------------------------------------------------|-----------------------------------------------|----------------|
| Interaction term: systolic BP 110-119 x thiazide diuretics     | 1.31 (0.99 to 1.73)                           | 0.06           |
| Interaction term: systolic BP 120-129 x thiazide diuretics     | 0.98 (0.82 to 1.16)                           | 0.77           |
| Interaction term: systolic BP 140-149 x thiazide diuretics     | 1.00 (0.87 to 1.14)                           | 0.95           |
| Interaction term: systolic BP 150-159 x thiazide diuretics     | 0.97 (0.83 to 1.13)                           | 0.69           |
| Interaction term: systolic BP $\geq$ 160 x thiazide diuretics  | 0.96 (0.84 to 1.11)                           | 0.61           |
| Interaction term: systolic BP 110-119 x calcium antagonists    | 1.07 (0.80 to 1.43)                           | 0.65           |
| Interaction term: systolic BP 120-129 x calcium antagonists    | 1.07 (0.91 to 1.26)                           | 0.39           |
| Interaction term: systolic BP 140-149 x calcium antagonists    | 0.81 (0.71 to 0.92)                           | 0.002          |
| Interaction term: systolic BP 150-159 x calcium antagonists    | 0.84 (0.73 to 0.98)                           | 0.02           |
| Interaction term: systolic BP $\geq$ 160 x calcium antagonists | 0.86 (0.75 to 0.98)                           | 0.02           |
| Interaction term: systolic BP 110-119 x spironolactone         | 1.22 (0.73 to 2.03)                           | 0.45           |
| Interaction term: systolic BP 120-129 x spironolactone         | 0.70 (0.47 to 1.04)                           | 0.07           |
| Interaction term: systolic BP 140-149 x spironolactone         | 0.94 (0.68 to 1.31)                           | 0.72           |
| Interaction term: systolic BP 150-159 x spironolactone         | 0.79 (0.53 to 1.17)                           | 0.24           |
| Interaction term: systolic BP $\geq$ 160 x spironolactone      | 0.83 (0.57 to 1.20)                           | 0.32           |
| Interaction term: systolic BP 110-119 x B-blockers             | 0.95 (0.73 to 1.23)                           | 0.69           |
| Interaction term: systolic BP 120-129 x B-blockers             | 1.00 (0.86 to 1.16)                           | 0.99           |
| Interaction term: systolic BP 140-149 x B-blockers             | 1.04 (0.92 to 1.17)                           | 0.56           |
| Interaction term: systolic BP 150-159 x B-blockers             | 0.94 (0.82 to 1.09)                           | 0.43           |
| Interaction term: systolic BP $\geq$ 160 x B-blockers          | 0.98 (0.86 to 1.12)                           | 0.79           |
| Medication for heart disease (yes vs. no)                      | 1.65 (1.52 to 1.77)                           | <0.001         |

Figure A. Hazard ratios for different levels of baseline systolic blood pressure in relation to nonfatal CVD, i.e. a first event of nonfatal myocardial infarction or stroke.

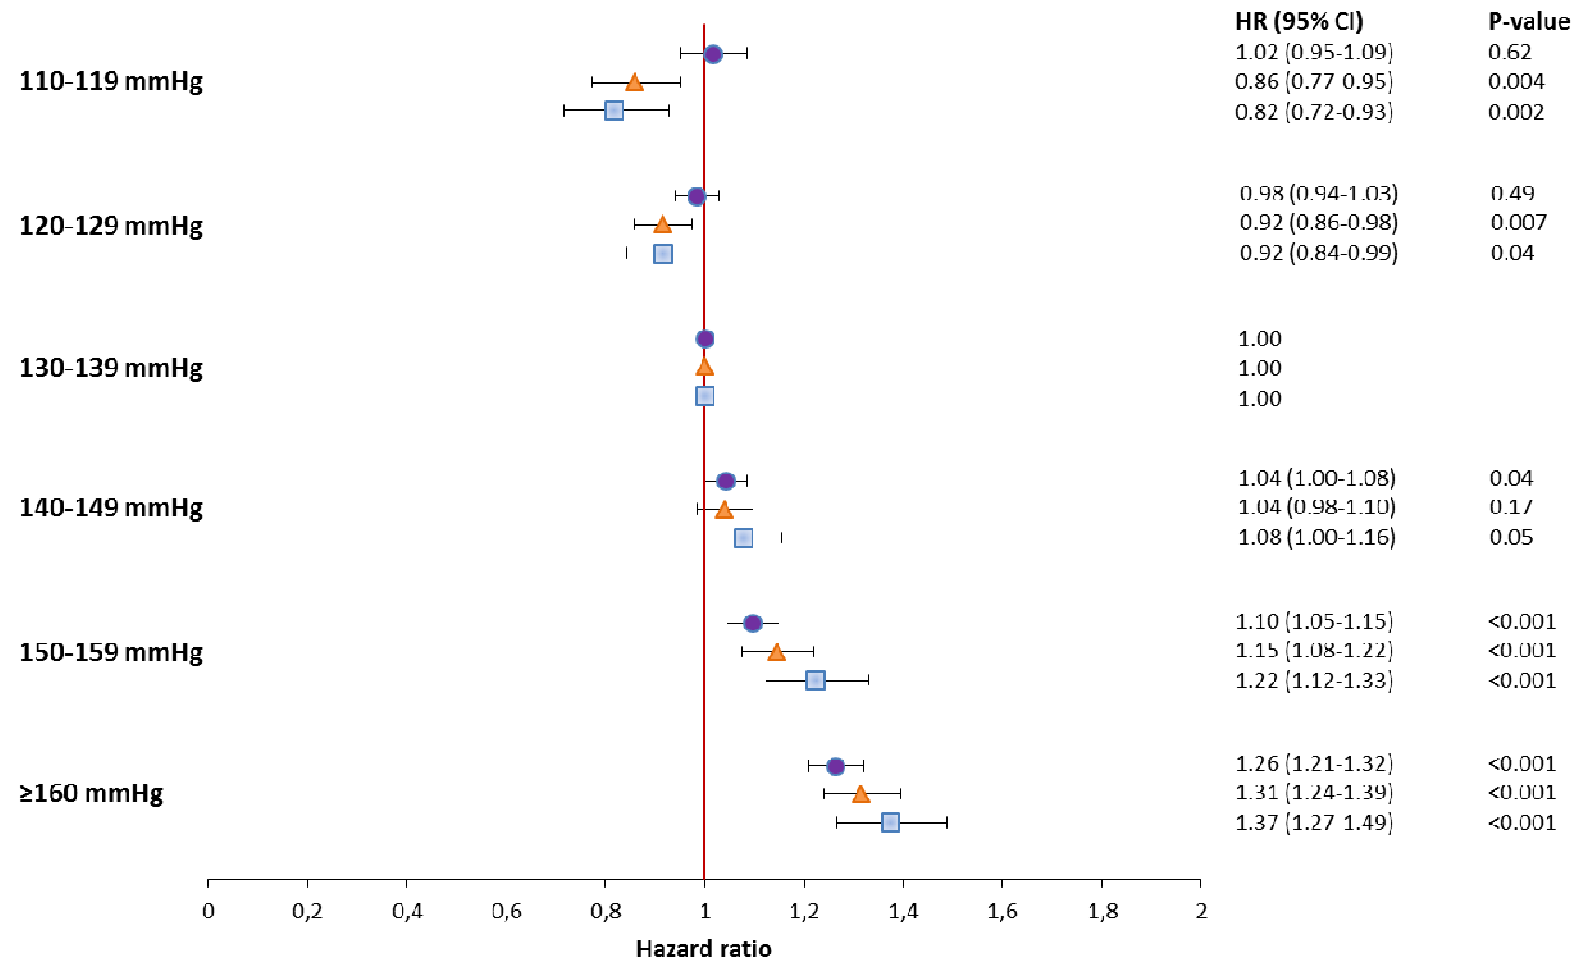

Light blue boxes represent the fully adjusted model including drug treatment covariates. Orange triangles represents the same analysis without drug treatment as covariates. Dark blue circles represent the model including individuals with previous diseases.



Figure B. Hazard ratios for different levels of baseline systolic blood pressure in relation to total CVD, i.e. a first event of nonfatal or fatal myocardial infarction or stroke.

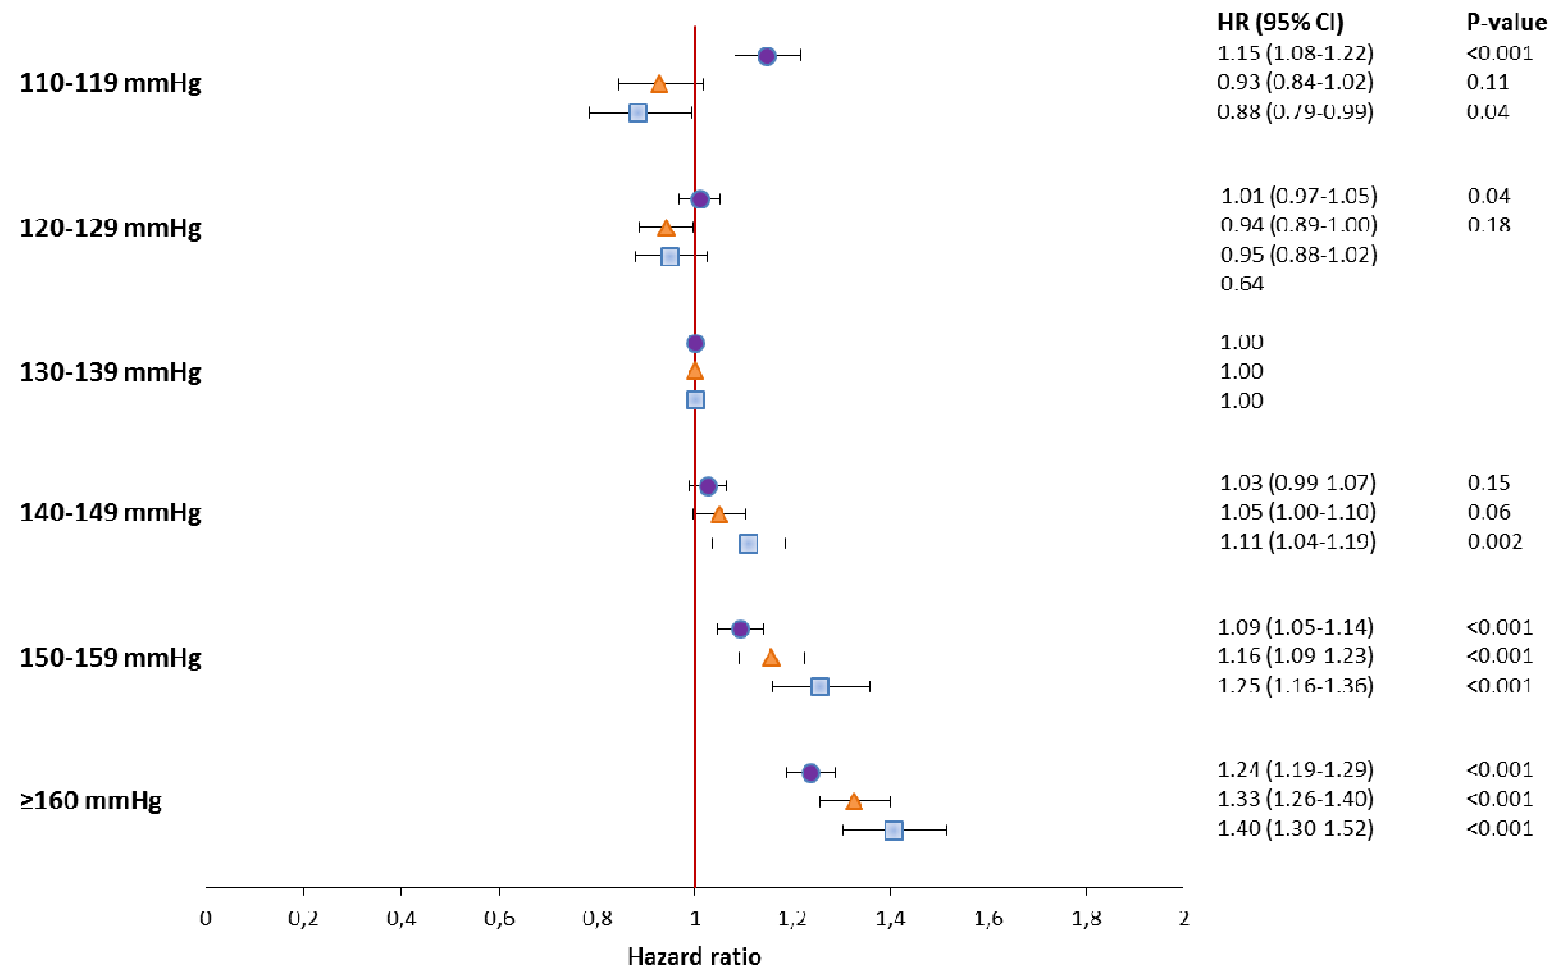

Light blue boxes represent the fully adjusted model including drug treatment covariates. Orange triangles represents the same analysis without drug treatment as covariates. Dark blue circles represent the model including individuals with previous diseases.

Figure C. Hazard ratios for different levels of baseline systolic blood pressure in relation to nonfatal AMI

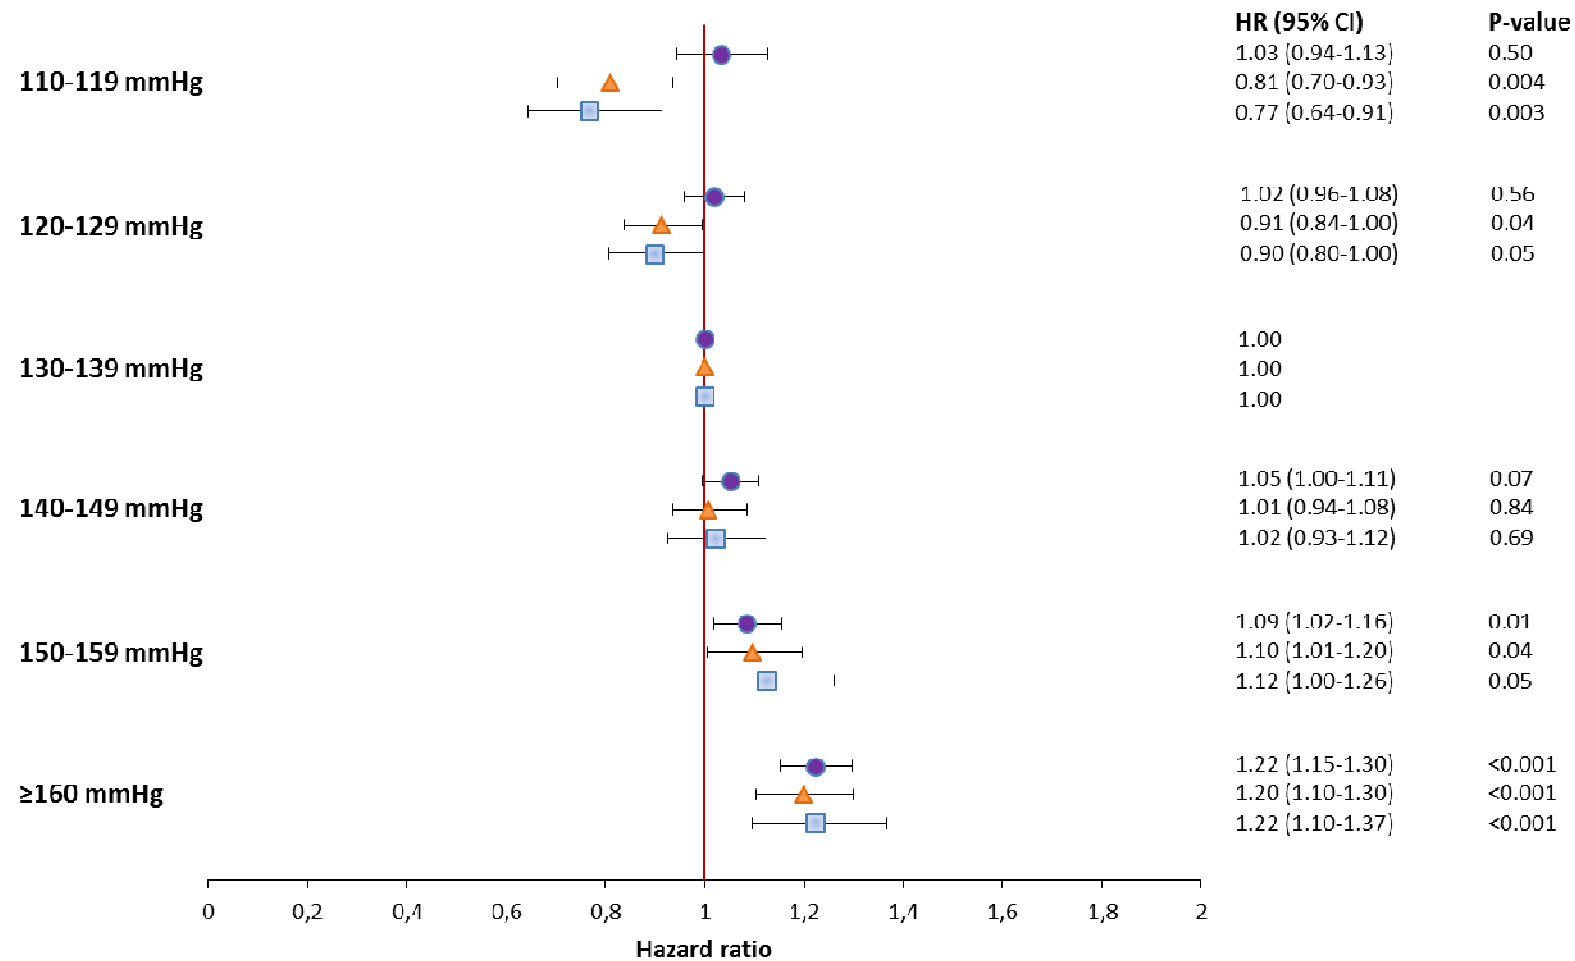

Light blue boxes represent the fully adjusted model including drug treatment covariates. Orange triangles represents the same analysis without drug treatment as covariates. Dark blue circles represent the model including individuals with previous diseases.

Figure D. Hazard ratios for different levels of baseline systolic blood pressure in relation to total AMI

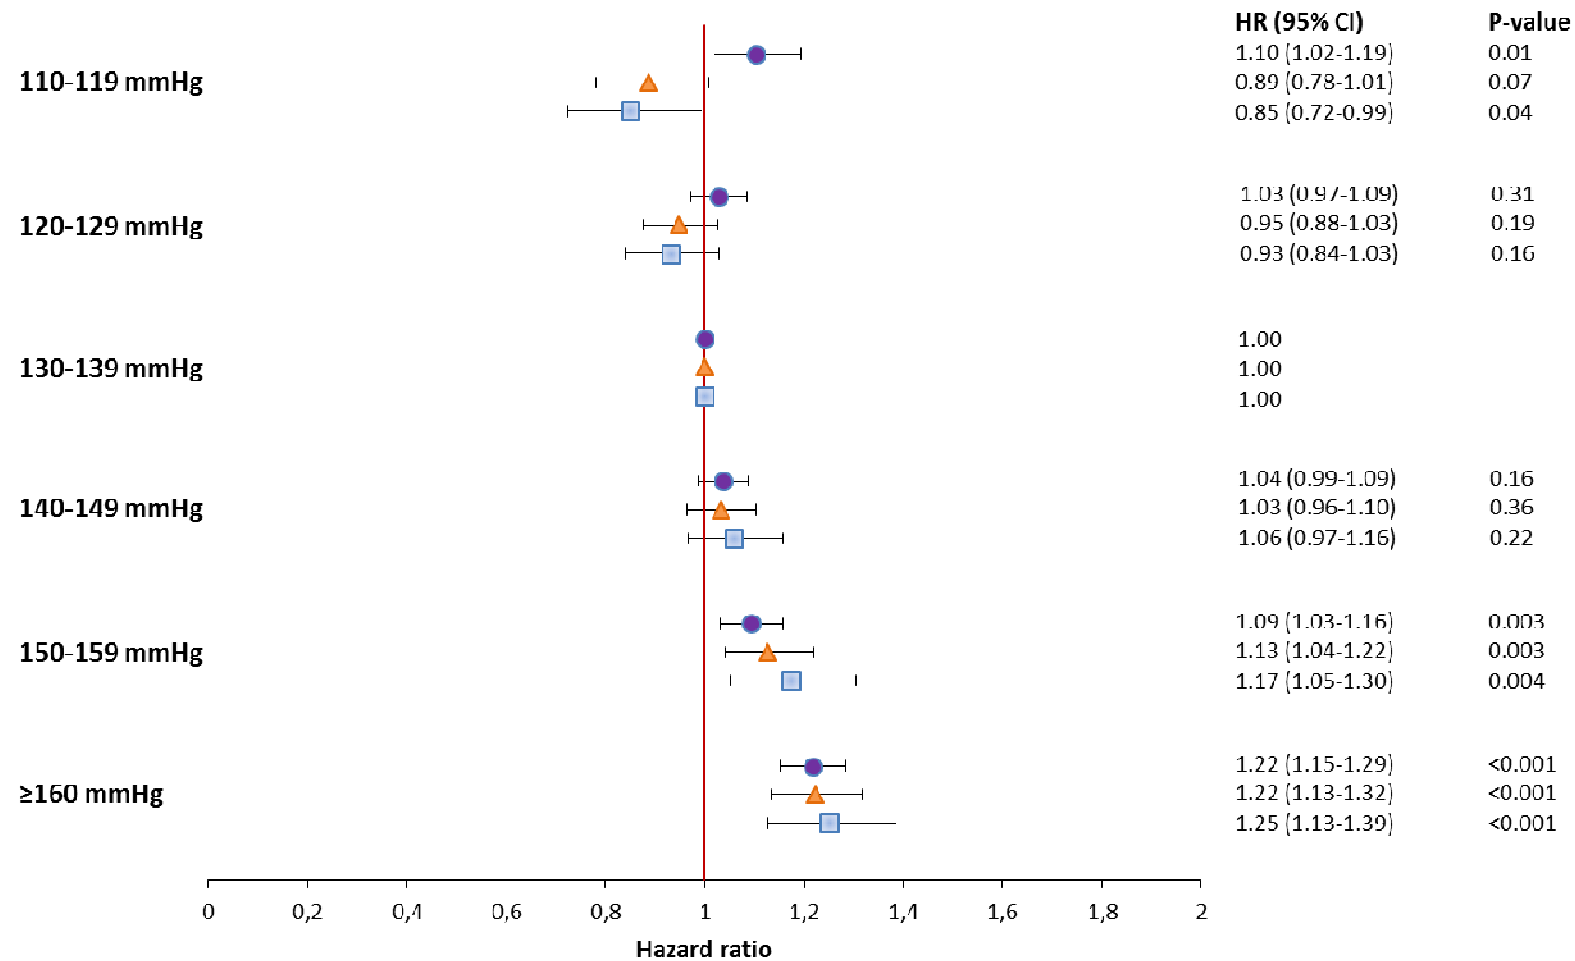

Light blue boxes represent the fully adjusted model including drug treatment covariates. Orange triangles represents the same analysis without drug treatment as covariates. Dark blue circles represent the model including individuals with previous diseases.

Figure E. Hazard ratios for different levels of baseline systolic blood pressure in relation to nonfatal stroke

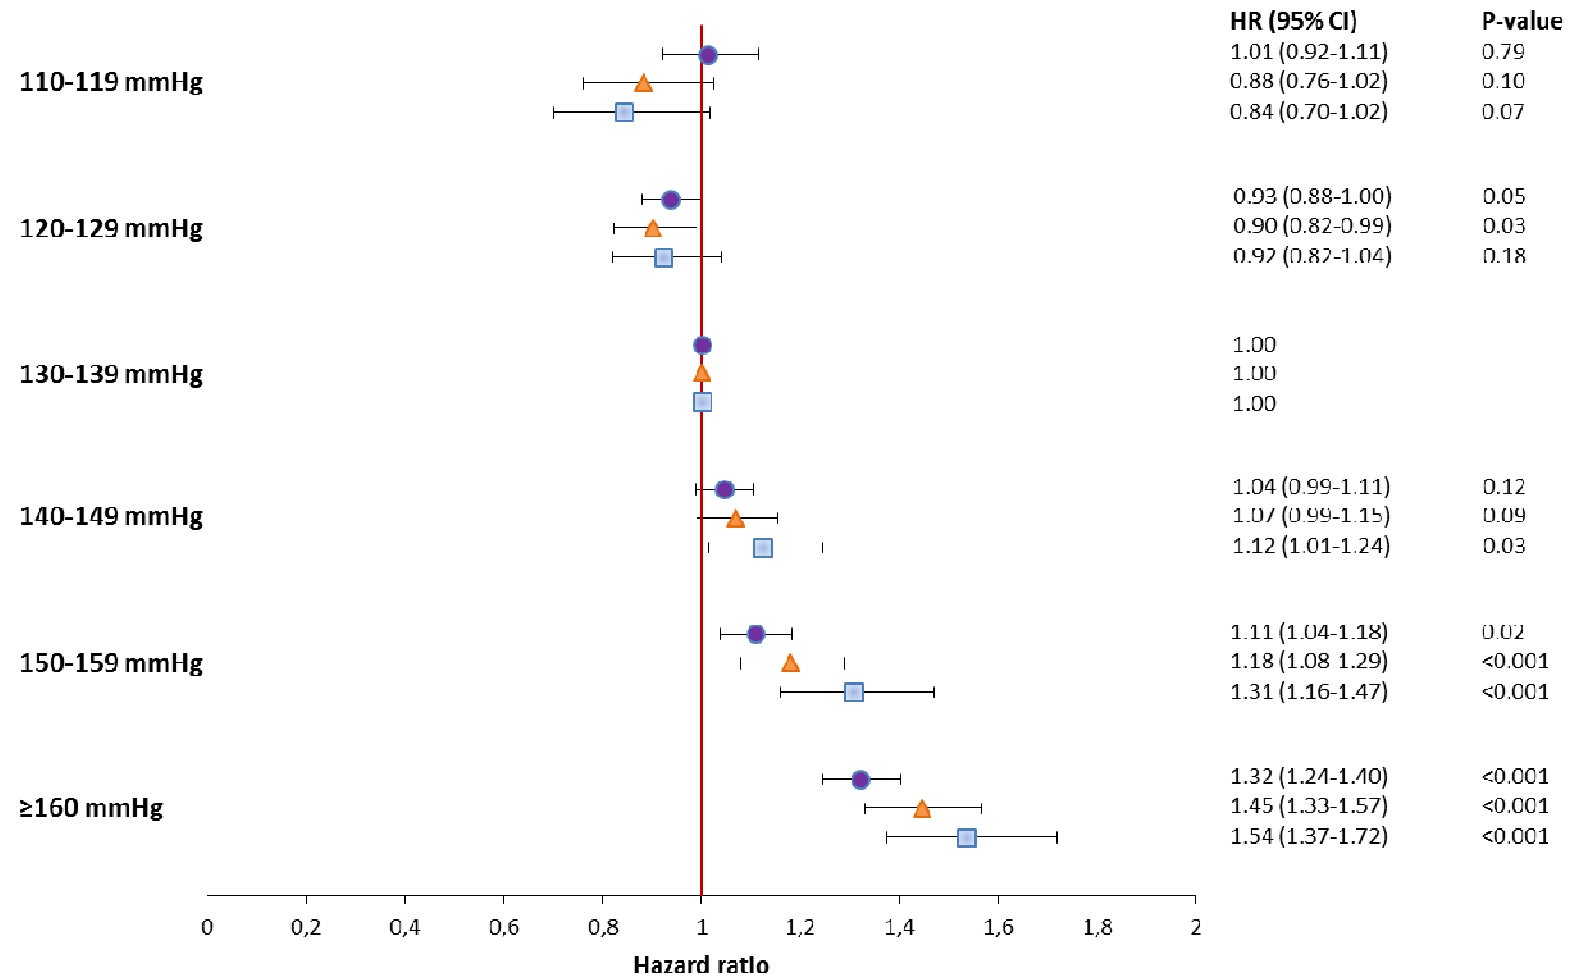

Light blue boxes represent the fully adjusted model including drug treatment covariates. Orange triangles represents the same analysis without drug treatment as covariates. Dark blue circles represent the model including individuals with previous diseases.

Figure F. Hazard ratios for different levels of baseline systolic blood pressure in relation to total stroke

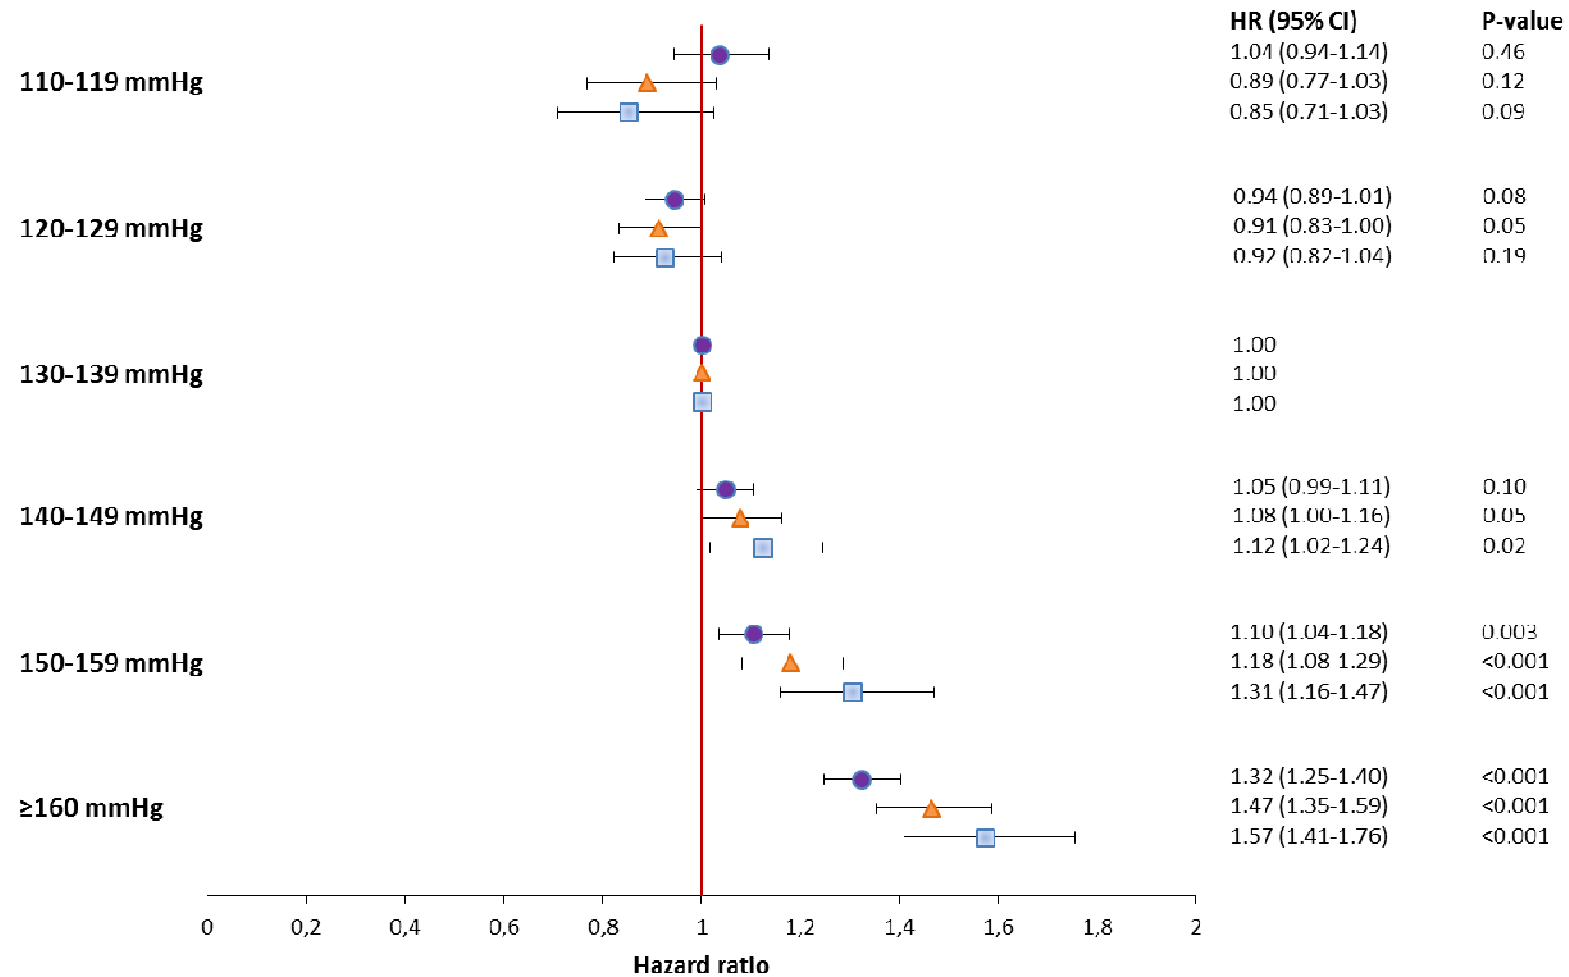

Light blue boxes represent the fully adjusted model including drug treatment covariates. Orange triangles represents the same analysis without drug treatment as covariates. Dark blue circles represent the model including individuals with previous diseases.

Figure G. Hazard ratios for different levels of baseline systolic blood pressure in relation to nonfatal coronary heart disease

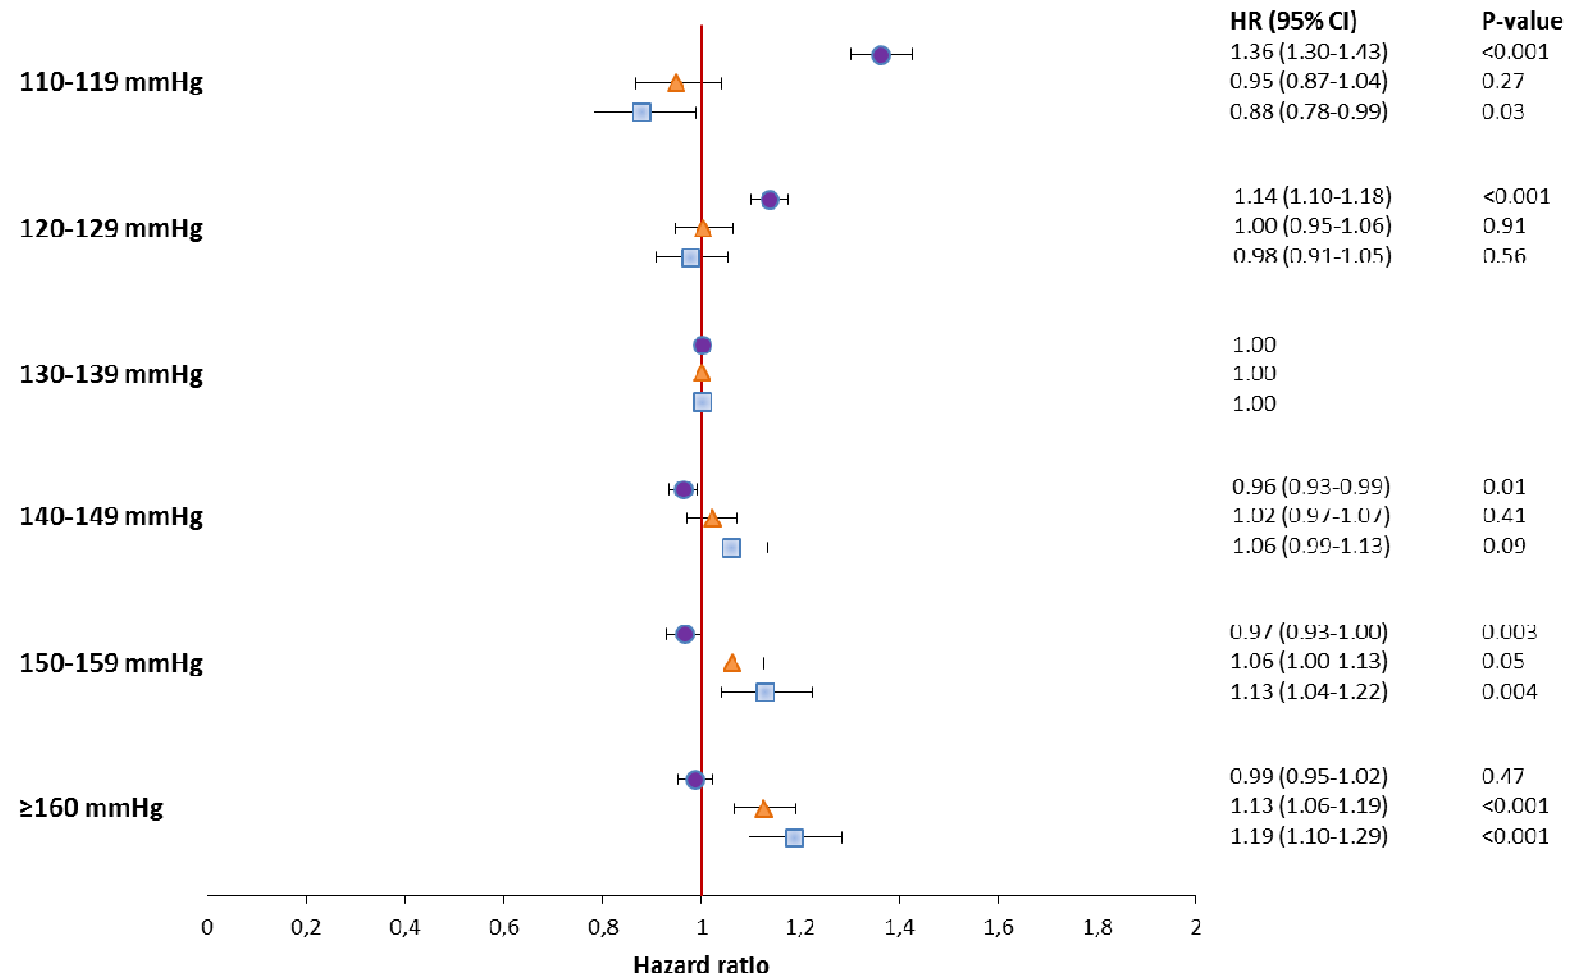

Light blue boxes represent the fully adjusted model including drug treatment covariates. Orange triangles represents the same analysis without drug treatment as covariates. Dark blue circles represent the model including individuals with previous diseases.

Figure H. Hazard ratios for different levels of baseline systolic blood pressure in relation to total coronary heart disease

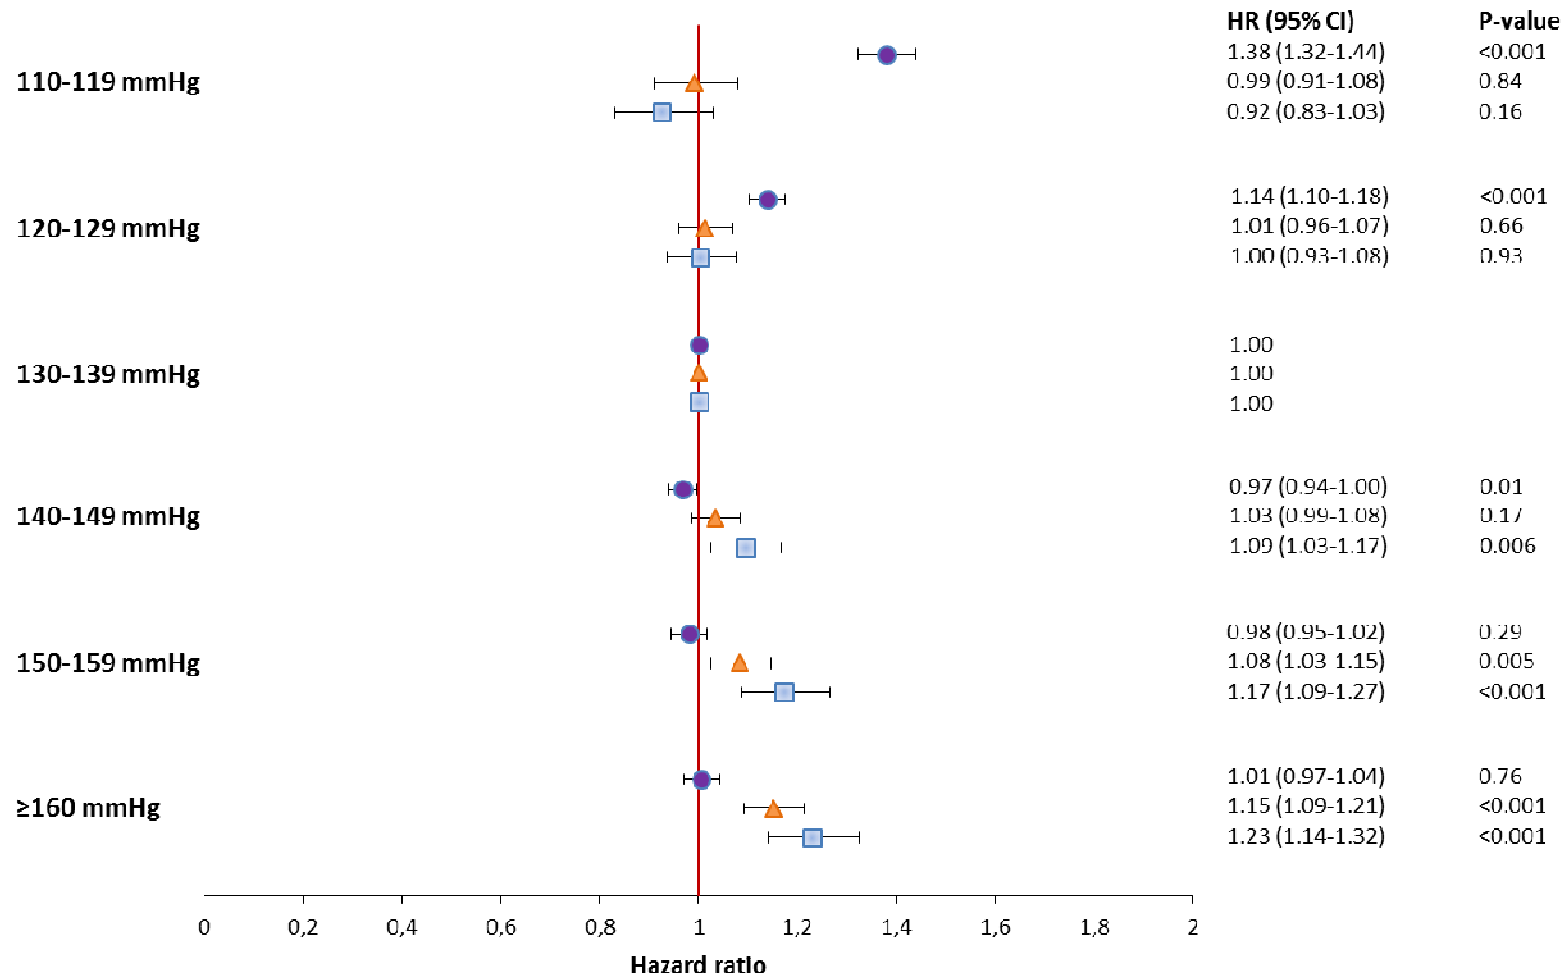

Light blue boxes represent the fully adjusted model including drug treatment covariates. Orange triangles represents the same analysis without drug treatment as covariates. Dark blue circles represent the model including individuals with previous diseases.

Figure I. Hazard ratios for different levels of baseline systolic blood pressure in relation to heart failure

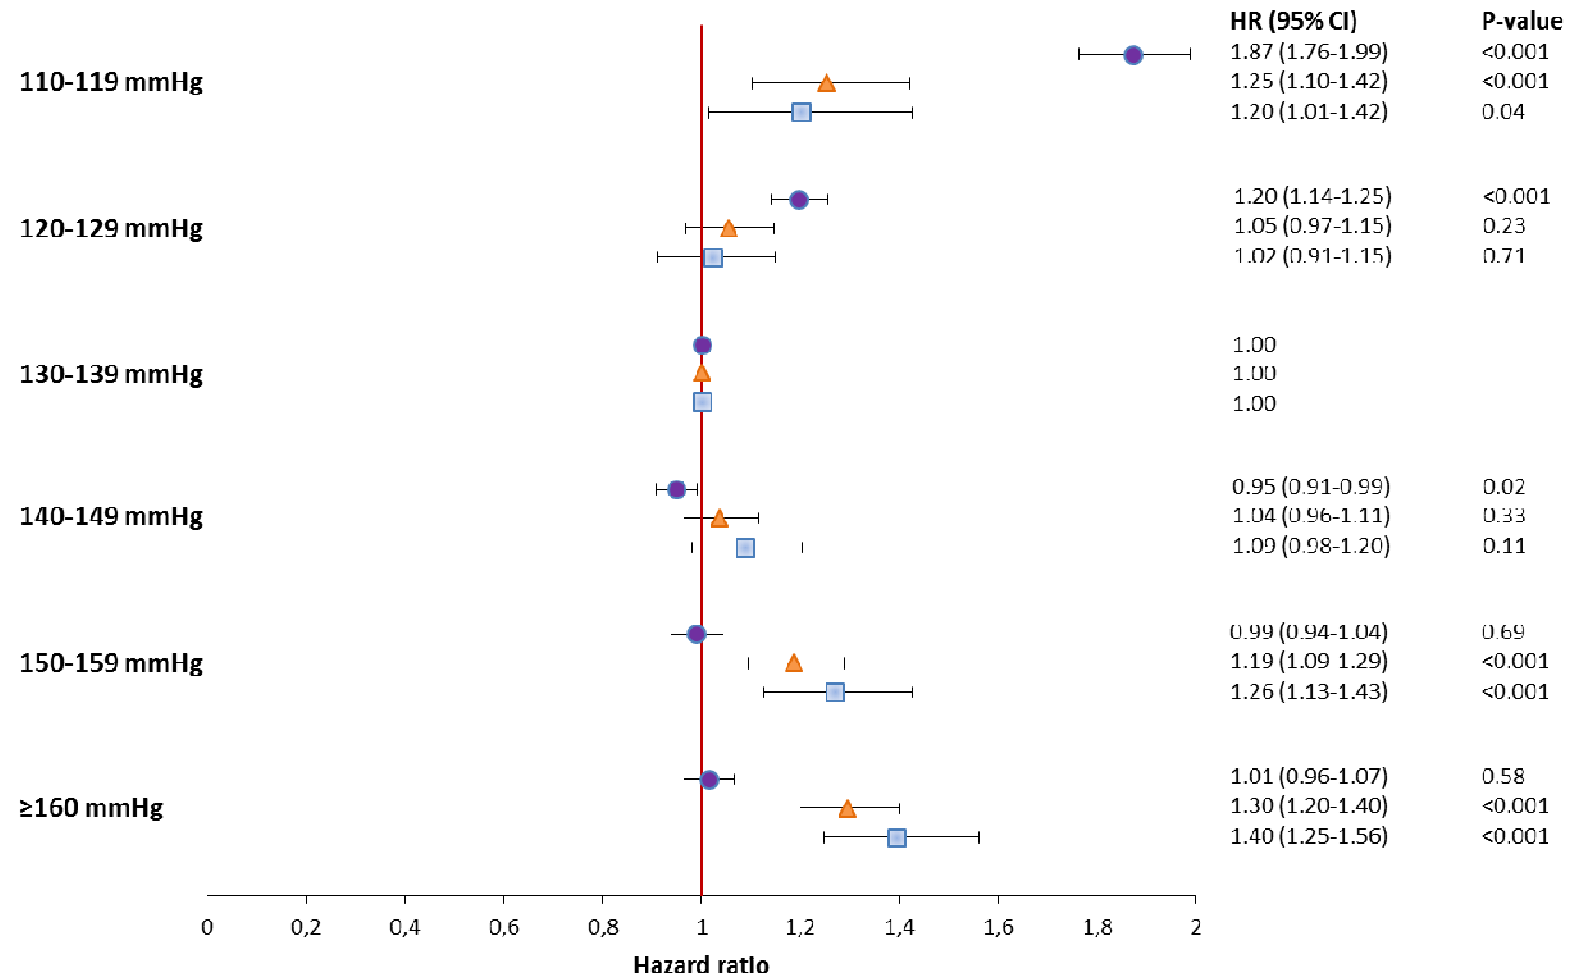

Light blue boxes represent the fully adjusted model including drug treatment covariates. Orange triangles represents the same analysis without drug treatment as covariates. Dark blue circles represent the model including individuals with previous diseases.



Figure J. Hazard ratios for different levels of baseline systolic blood pressure in relation to total mortality

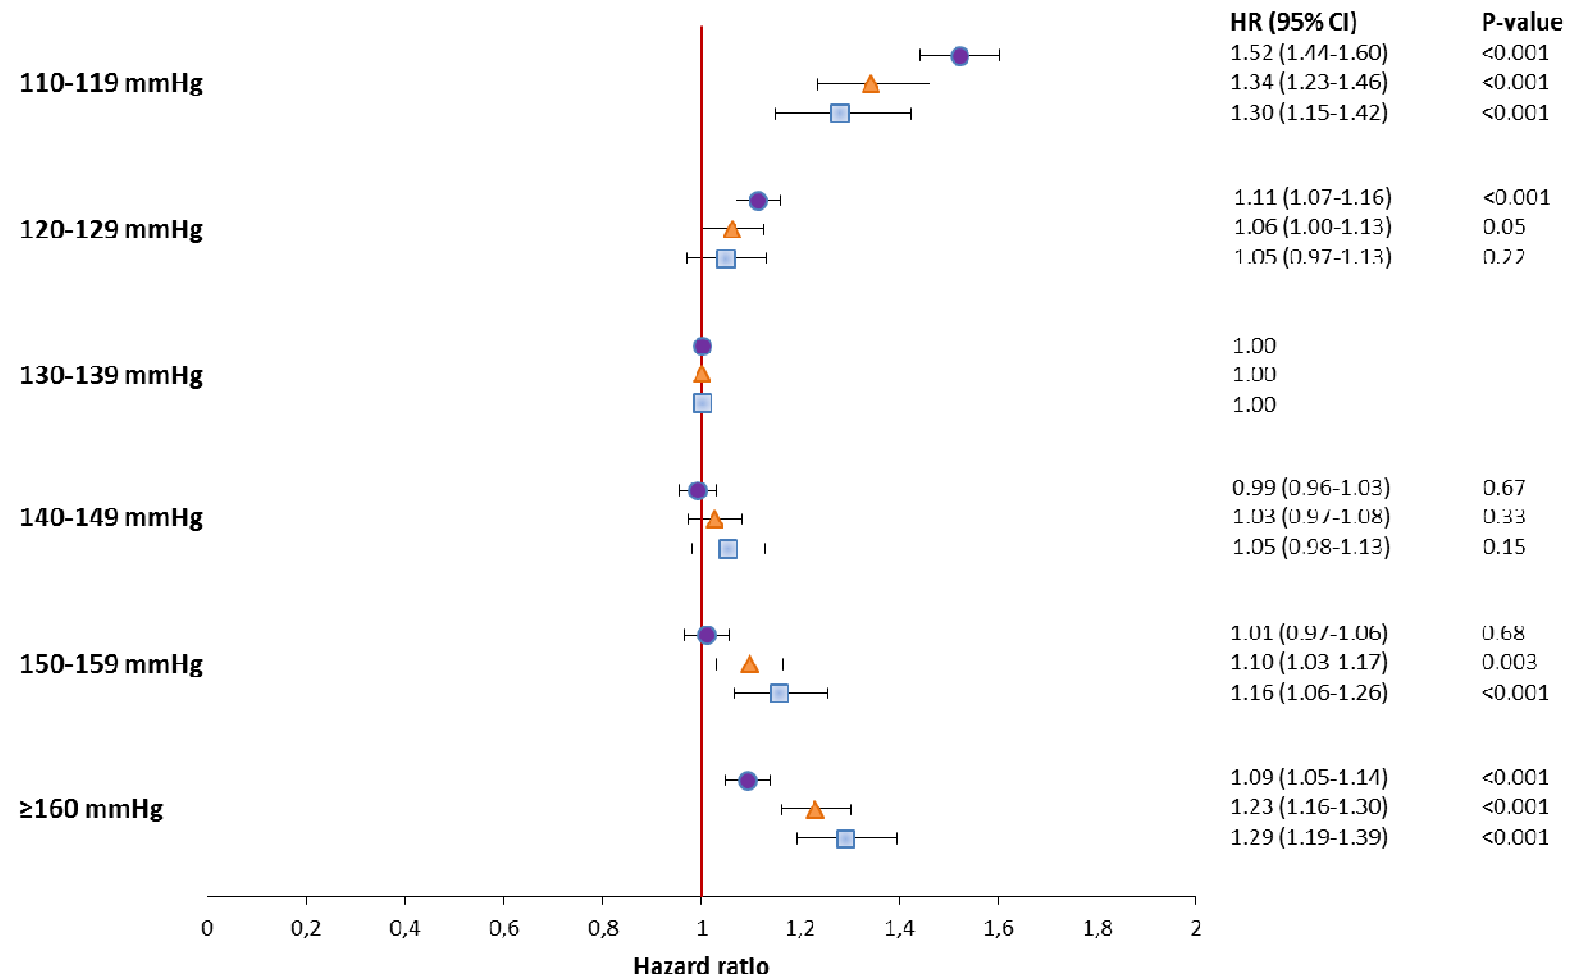

Light blue boxes represent the fully adjusted model including drug treatment covariates. Orange triangles represents the same analysis without drug treatment as covariates. Dark blue circles represent the model including individuals with previous diseases.

Table C. Frequencies of primary causes of death in different systolic blood pressure groups

| <b>Primary cause of death</b>                        | <b>110-119 mmHg<br/>(n=684)</b> | <b>120-129 mmHg<br/>(n=1841)</b> | <b>130-139 mmHg<br/>(n=2749)</b> | <b>140-149 mmHg<br/>(n=2916)</b> | <b>150-159 mmHg<br/>(n=1692)</b> | <b>≥160 mmHg<br/>(n=2270)</b> |
|------------------------------------------------------|---------------------------------|----------------------------------|----------------------------------|----------------------------------|----------------------------------|-------------------------------|
| Certain infectious and parasitic diseases            | 22 (3.2%)                       | 28 (1.5%)                        | 67 (2.4%)                        | 70 (2.4%)                        | 37 (2.2%)                        | 52 (2.3%)                     |
| Neoplasms                                            | 221 (32.3%)                     | 670 (36.4%)                      | 1091 (39.7%)                     | 1056 (36.2%)                     | 574 (33.9%)                      | 690 (30.4%)                   |
| Diseases of the blood and blood-forming organs       | 3 (0.4%)                        | 4 (0.2%)                         | 9 (0.3%)                         | 7 (0.2%)                         | 5 (0.3%)                         | 2 (0.1%)                      |
| Endocrine, nutritional and metabolic diseases        | 55 (8.0%)                       | 154 (8.4%)                       | 211 (7.7%)                       | 246 (8.4%)                       | 156 (9.2%)                       | 267 (11.8%)                   |
| Mental, behavioural and neurodevelopmental disorders | 6 (0.9%)                        | 34 (1.8%)                        | 57 (2.1%)                        | 63 (2.2%)                        | 29 (1.7%)                        | 48 (2.1%)                     |
| Diseases of the nervous system                       | 22 (3.2%)                       | 55 (3.0%)                        | 65 (2.4%)                        | 60 (2.1%)                        | 27 (1.6%)                        | 41 (1.8%)                     |
| Diseases of the circulatory system                   | 191 (27.9%)                     | 500 (27.2%)                      | 744 (27.1%)                      | 870 (29.8%)                      | 579 (34.2%)                      | 779 (34.3%)                   |
| Diseases of the respiratory system                   | 43 (6.3%)                       | 91 (4.9%)                        | 123 (4.5%)                       | 150 (5.1%)                       | 80 (4.7%)                        | 100 (4.4%)                    |
| Diseases of the digestive system                     | 46 (6.7%)                       | 121 (6.6%)                       | 133 (4.8%)                       | 143 (4.9%)                       | 72 (4.3%)                        | 97 (4.3%)                     |
| Diseases of the skin and subcutaneous tissue         | 0 (0.0%)                        | 1 (0.1%)                         | 6 (0.2%)                         | 5 (0.2%)                         | 2 (0.1%)                         | 1 (0.0%)                      |

| <b>Primary cause of death</b>                                        | <b>110-119 mmHg<br/>(n=684)</b> | <b>120-129 mmHg<br/>(n=1841)</b> | <b>130-139 mmHg<br/>(n=2749)</b> | <b>140-149 mmHg<br/>(n=2916)</b> | <b>150-159 mmHg<br/>(n=1692)</b> | <b>≥160 mmHg<br/>(n=2270)</b> |
|----------------------------------------------------------------------|---------------------------------|----------------------------------|----------------------------------|----------------------------------|----------------------------------|-------------------------------|
| Diseases of the musculoskeletal system and connective tissue         | 2 (0.3%)                        | 8 (0.4%)                         | 10 (0.4%)                        | 11 (0.4%)                        | 8 (0.5%)                         | 12 (0.5%)                     |
| Diseases of the genitourinary system                                 | 6 (0.9%)                        | 18 (1.0%)                        | 22 (0.8%)                        | 24 (0.8%)                        | 20 (1.2%)                        | 23 (1.0%)                     |
| Congenital malformations, deformations and chromosomal abnormalities | 0 (0.0%)                        | 3 (0.2%)                         | 3 (0.1%)                         | 1 (0.0%)                         | 0 (0.0%)                         | 3 (0.1%)                      |
| Symptoms, signs and abnormal clinical and laboratory finding         | 19 (2.8%)                       | 47 (2.6%)                        | 61 (2.2%)                        | 64 (2.2%)                        | 40 (2.4%)                        | 65 (2.9%)                     |
| External causes of morbidity                                         | 42 (6.1%)                       | 77 (4.2%)                        | 110 (4.0%)                       | 107 (3.7%)                       | 47 (2.8%)                        | 75 (3.3%)                     |

## Drugs as covariates and interaction terms.

Drugs were used as covariates in regression model 3 if they were associated with risk for CVD, interpreted as markers for comorbidity. The drugs were included with an interaction term with systolic blood pressure if the relationship with the endpoint nonfatal CVD was nonlinear.

The following drugs were tested: calcium antagonists,  $\beta$ -blockers, loop diuretics, thiazide diuretics, renin-angiotensin system inhibitors or angiotensin II blockers (RAAS blocking agents), and spironolactone. The drugs were tested one-by-one in separate cox regression models with nonfatal CVD as endpoint. The models were adjusted for age, sex, diabetes duration, smoking status, HbA1c, LDL-cholesterol, HDL-cholesterol, triglycerides, microalbuminuria, macroalbuminuria, diabetes treatment, BMI, and eGFR. The results are presented in figures S11-S16.

## Conclusion/interpretation

The following drugs showed an increased risk with CVD and were thus included as covariates in regression model 3: thiazide diuretics, loop diuretics, calcium antagonists, spironolactone, and  $\beta$ -blockers. Of those, the following drugs were included with an interaction term with systolic blood pressure: thiazide diuretics, calcium antagonists, spironolactone, and  $\beta$ -blockers.

Figure K. Hazard ratio for CVD for patients with, or without calcium antagonists

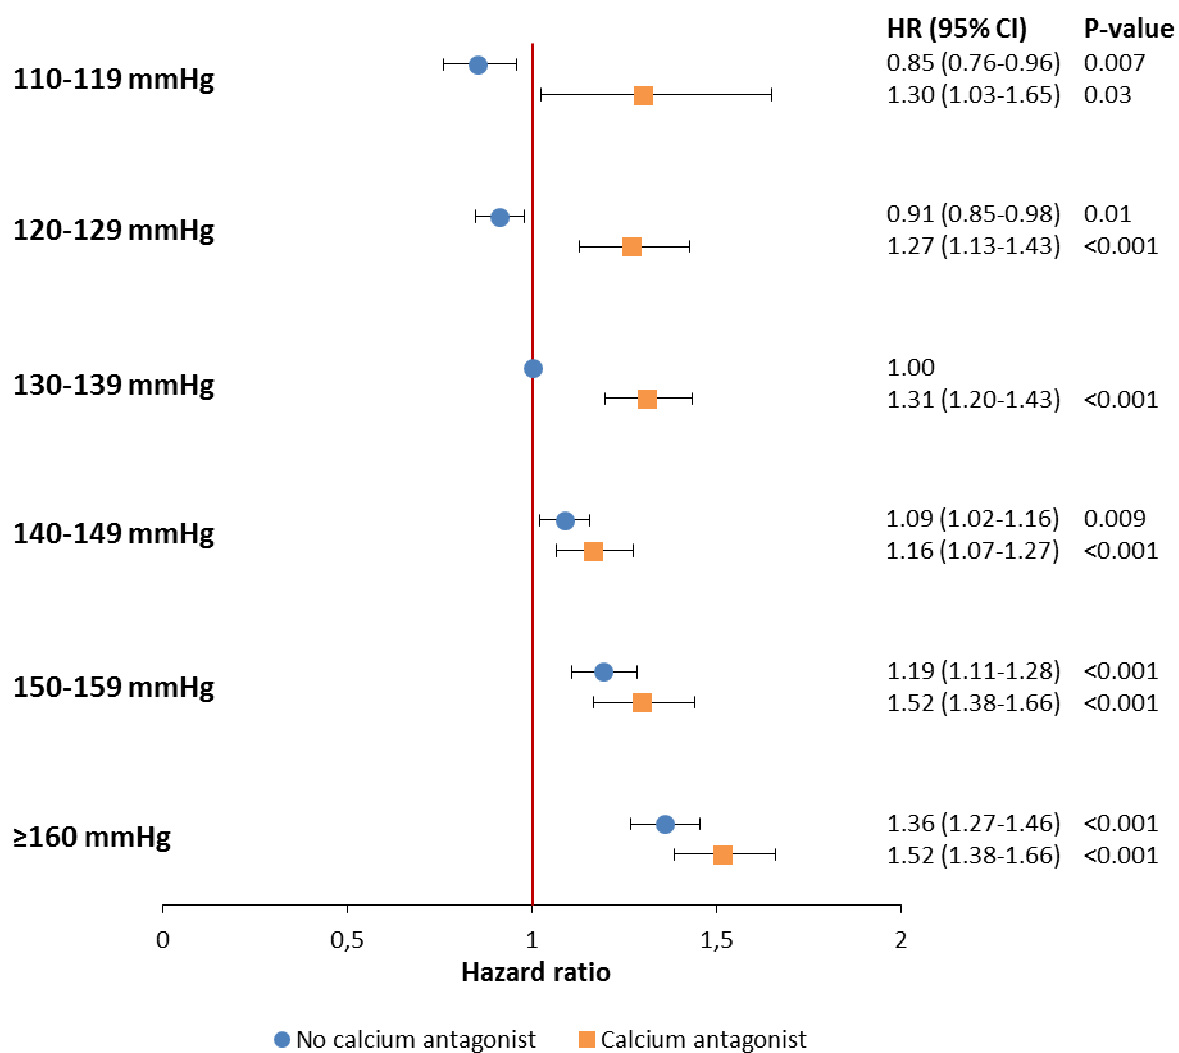

Figure L. Hazard ratio for CVD for patients with, or without  $\beta$ -blockers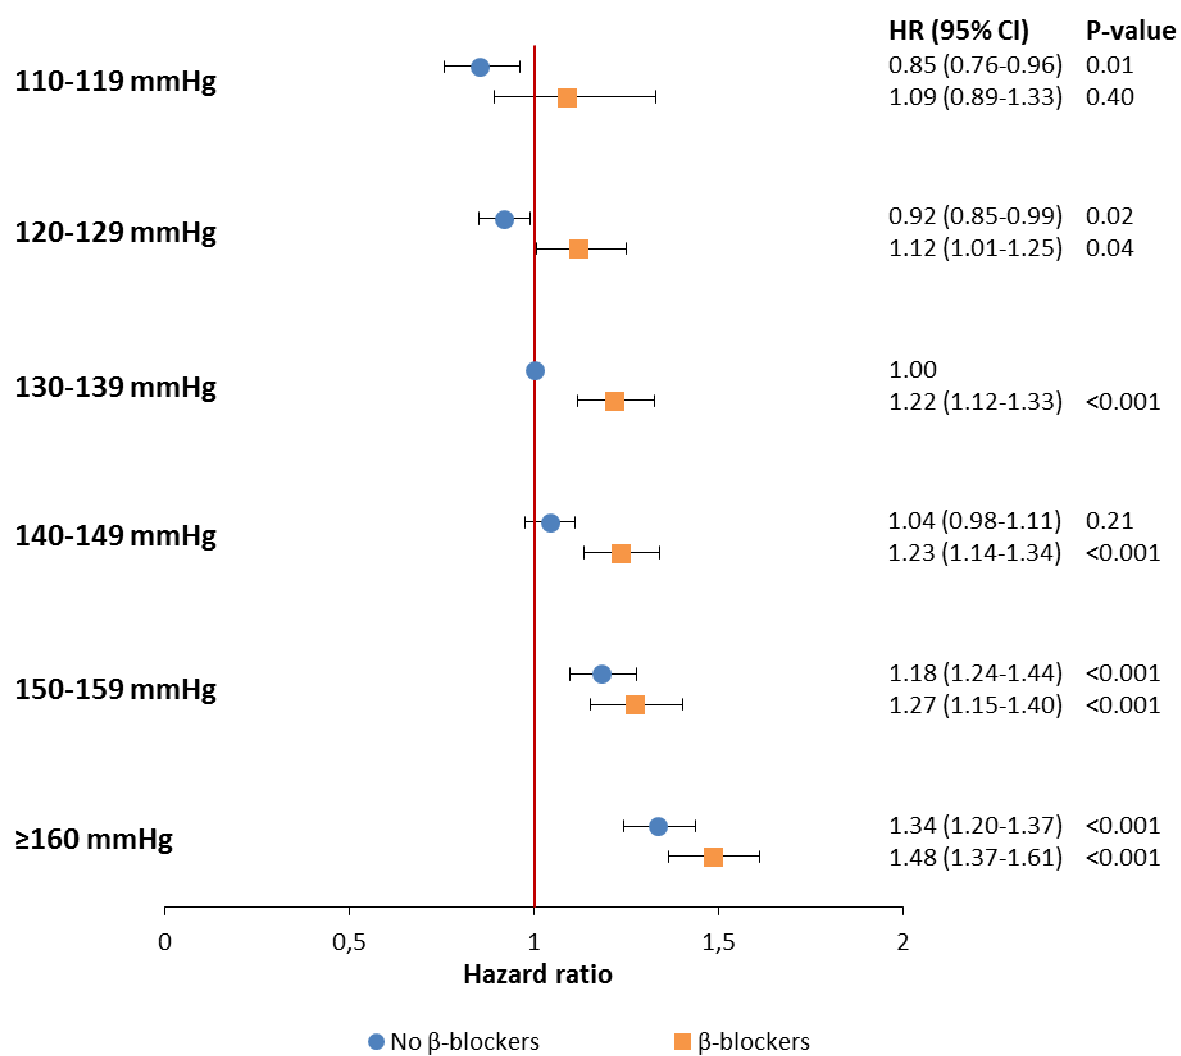

Figure M. Hazard ratio for CVD for patients with, or without loop diuretics

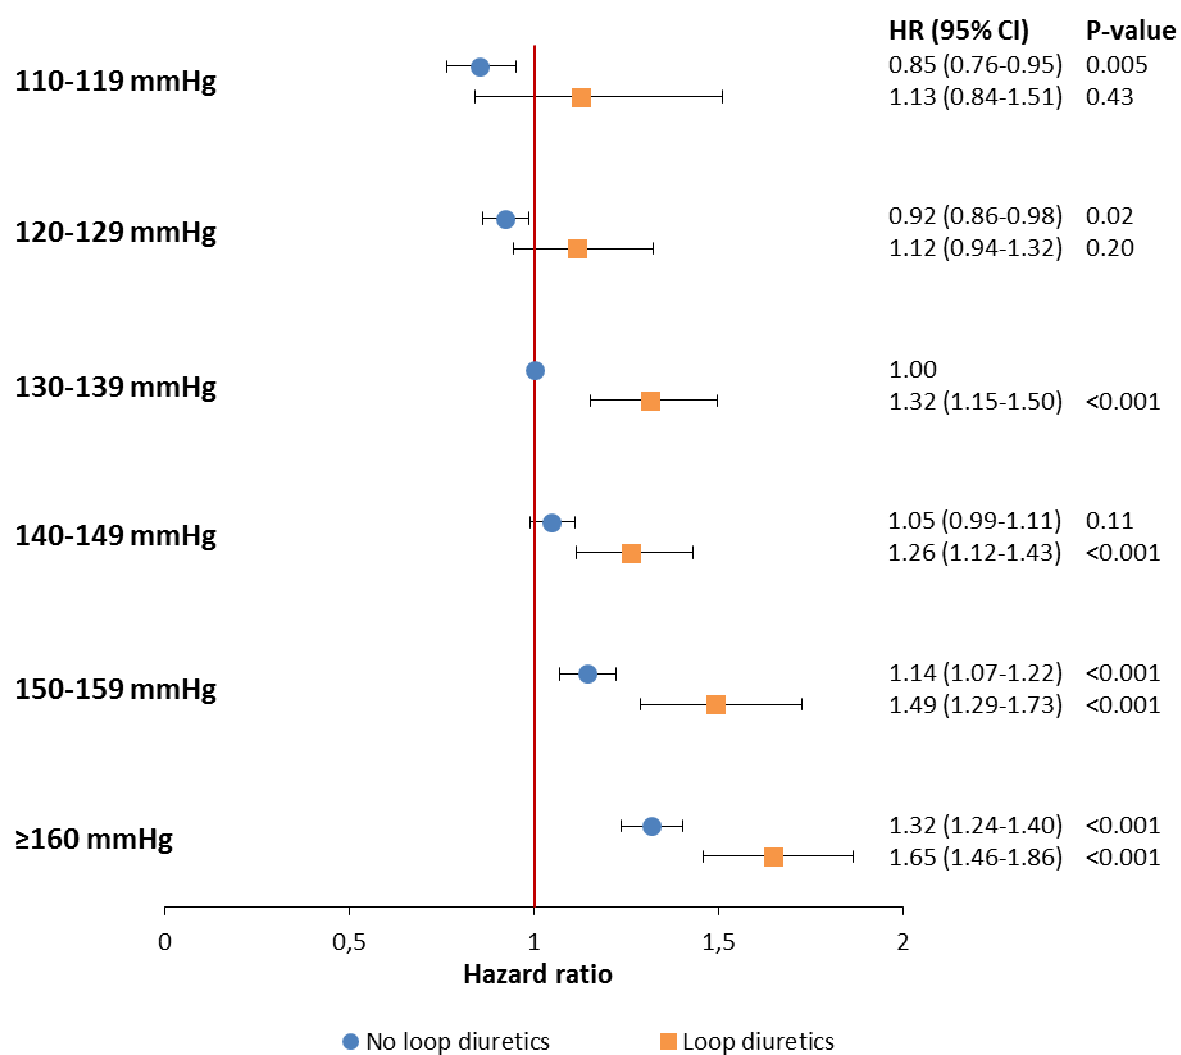

Figure N. Hazard ratio for CVD for patients with, or without thiazide diuretics

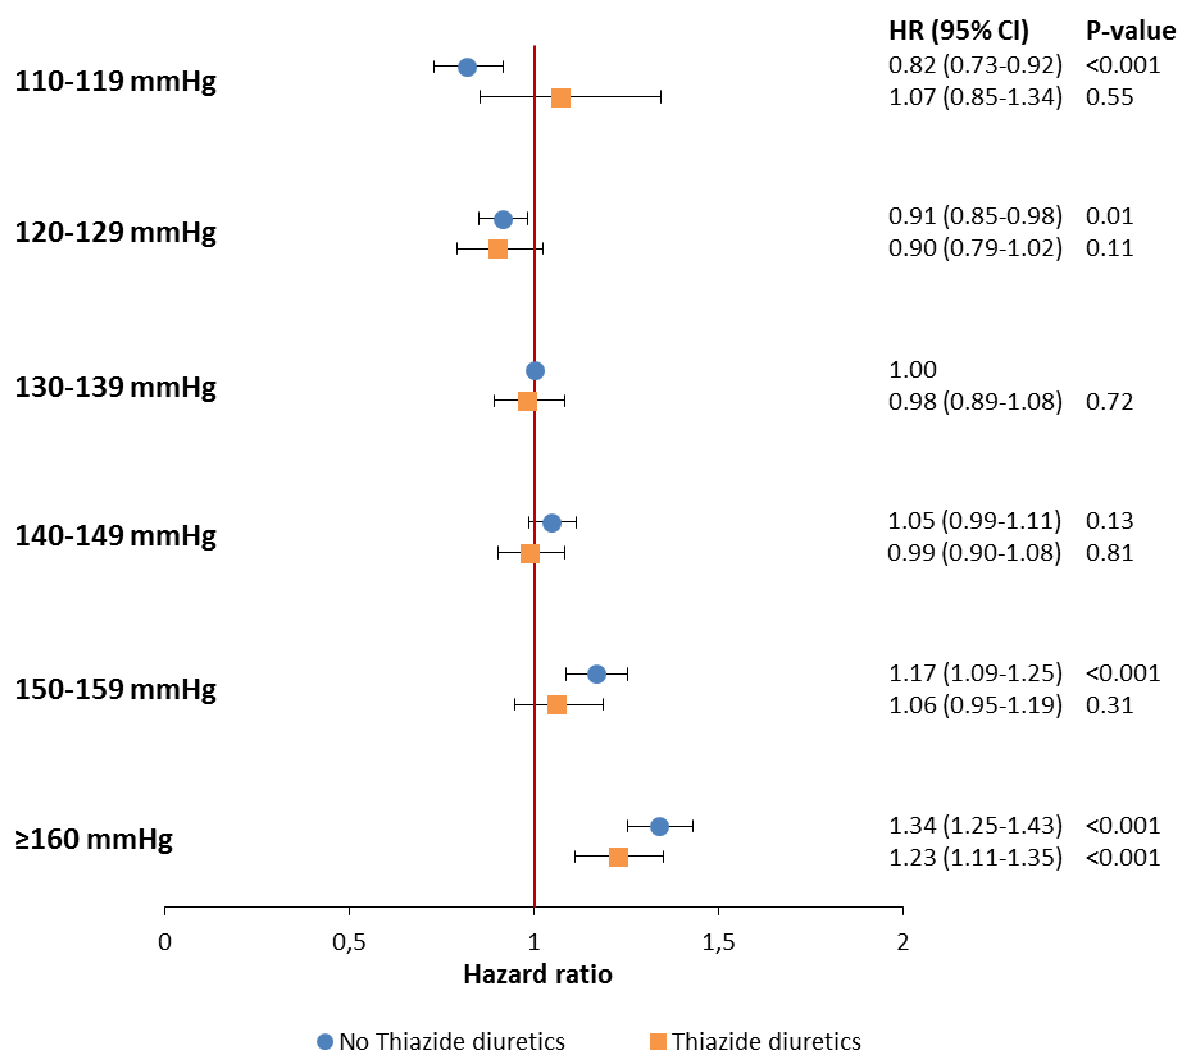



Figure O. Hazard ratio for CVD for patients with, or without RAAS blocking agents

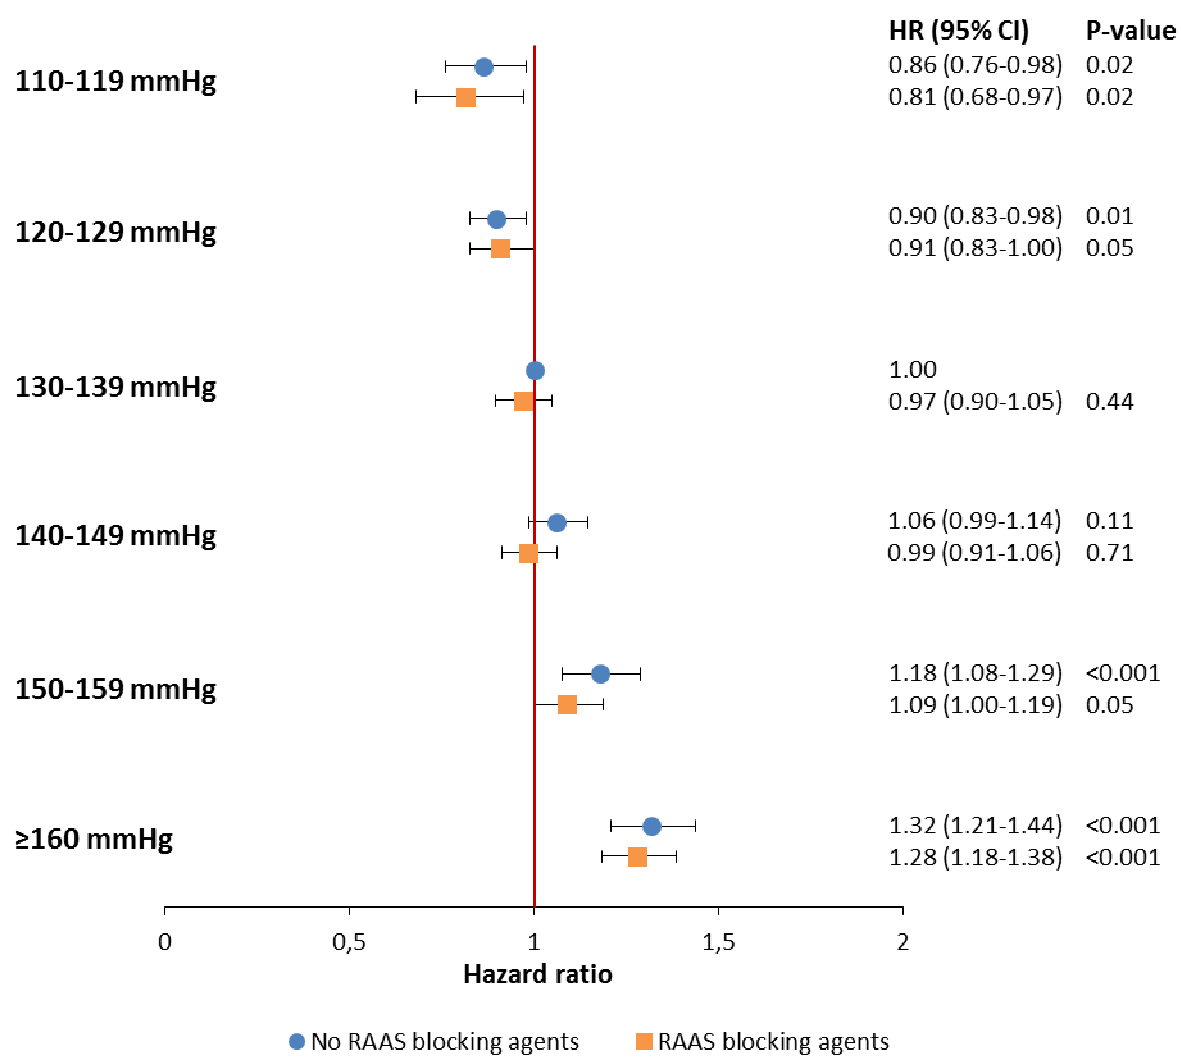

Figure P. Hazard ratio for CVD for patients with, or without spironolactone

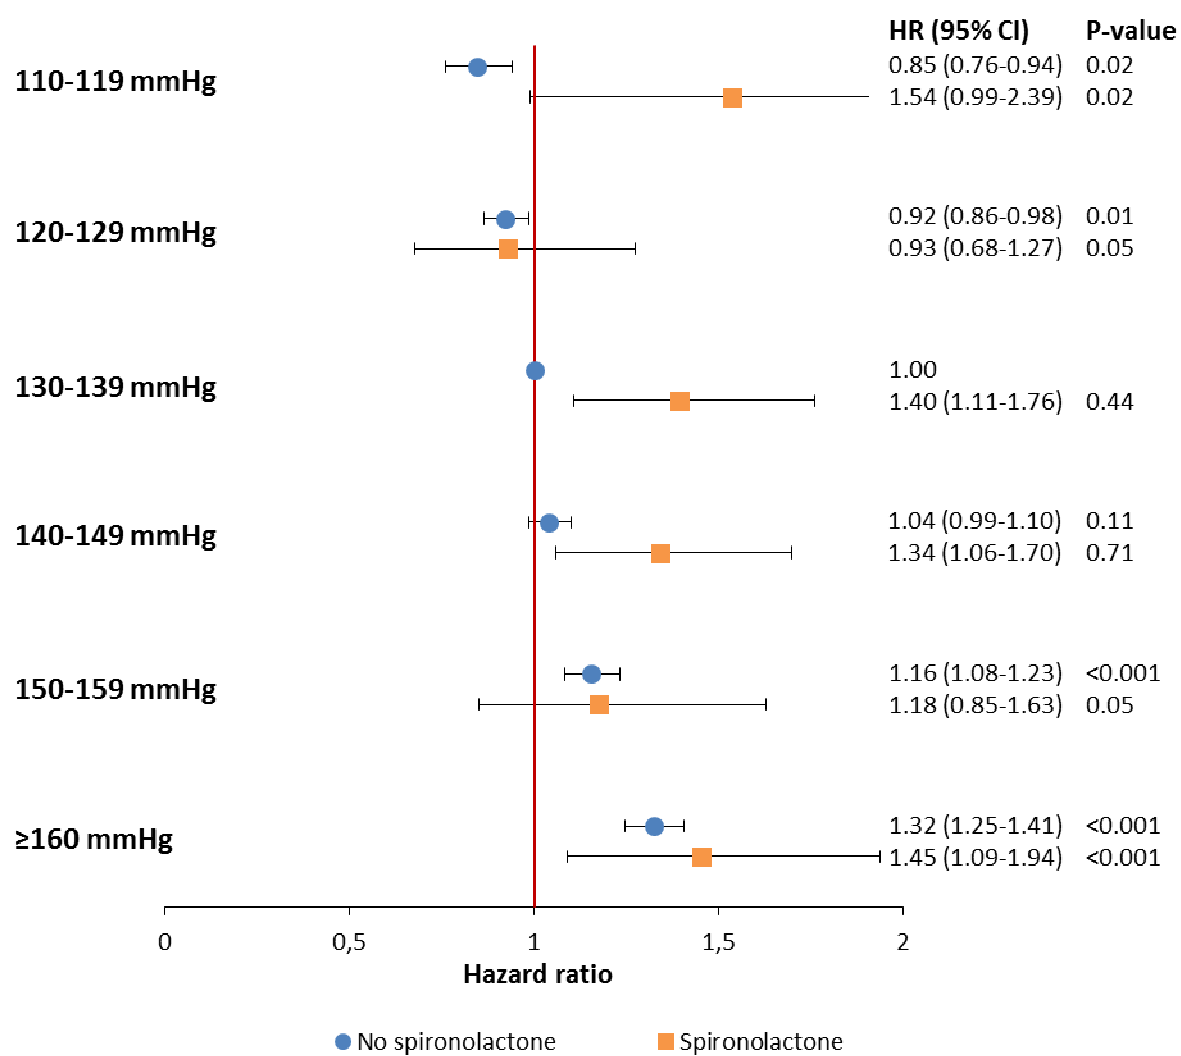

Table D. Drugs included in Cox regression model as a covariate for medication for heart disease (1/0)

| <b>ATC code</b> | <b>International Nonproprietary Name</b> |
|-----------------|------------------------------------------|
| B01AC04         | Clopidogrel                              |
| B01AC05         | Ticlopidine                              |
| B01AC07         | Dipyridamole                             |
| B01AC22         | Prasugrel                                |
| B01AC24         | Ticagrelor                               |
| B01AC30         | Combinations                             |
| C01AA04         | Digitoxin                                |
| C01AA05         | Digoxin                                  |
| C01BA01         | Kinidine                                 |
| C01BA03         | Disopyramide                             |
| C01BB02         | Mexiletine                               |
| C01BC03         | Propafenone                              |
| C01BC04         | Flecainide                               |
| C01BD01         | Amiodarone                               |
| C01BD07         | Dronedarone                              |

## Treatment intensity at the care unit level

As a measure of antihypertensive treatment at the care unit level, the percentage of patients receiving a combination of a thiazide diuretic, calcium antagonist and either a renin-angiotensin system inhibitor or angiotensin II blocker (triple therapy) was used. The hypothesis was that the approach offers an indicator for a step-up strategy and thus a measure of low blood pressure due to antihypertensive treatment rather than spontaneous low blood pressure.

In order to avoid outlier bias, the frequency with which the triple drug regimen is used was determined by examining individuals in the 125-140 mmHg range at clinics with  $\geq 150$  patients. A total of 21,902 individuals were excluded because their clinics had too few patients.

Values were standardized by transforming the 10th percentile to 0 and the 90th percentile to 1.

## Results

Figure Q. Distribution of covariate for triple therapy for individual care units.

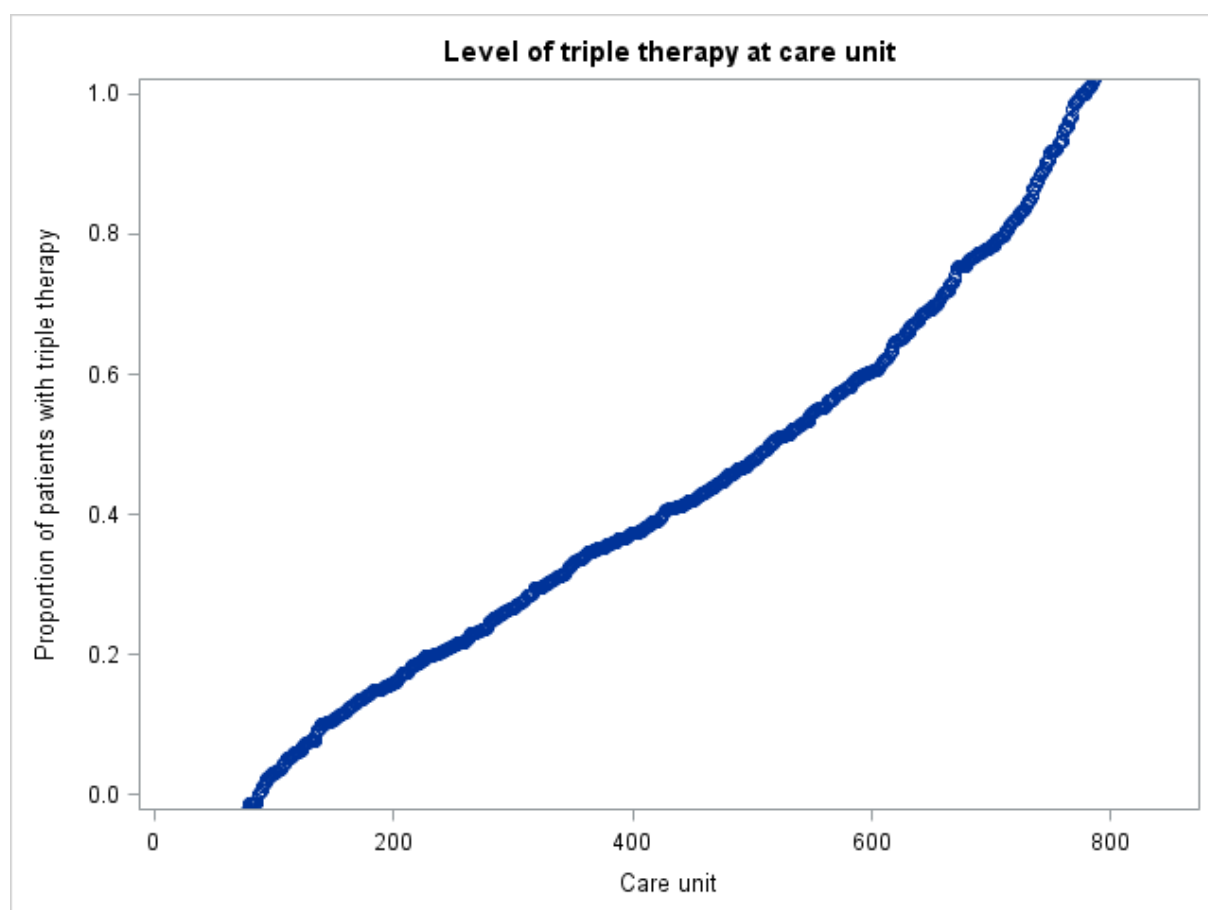

Table E. Logistic regression showing individual patient's probability to reach systolic blood pressure lower than 130 mmHg in relation to care unit treatment activity

| Variable                                                  | Odds ratio (95% CI)           | p-value          |
|-----------------------------------------------------------|-------------------------------|------------------|
| Age, per year                                             | 0.947 (0.946 to 0.948)        | <0.001           |
| Diabetes duration, per year                               | 0.987 (0.985 to 0.989)        | <0.001           |
| Female (vs. male)                                         | 1.190 (1.164 to 1.217)        | <0.001           |
| HbA1c, per mmol/mol                                       | 0.993 (0.993 to 0.994)        | <0.001           |
| BMI, kg/m <sup>2</sup>                                    | 0.961 (0.959 to 0.963)        | <0.001           |
| HDL-cholesterol, per mmol/l                               | 0.877 (0.853 to 0.902)        | <0.001           |
| LDL-cholesterol, per mmol/l                               | 0.904 (0.894 to 0.915)        | <0.001           |
| eGFR, ml/min/1.73 m <sup>2</sup>                          | 0.998 (0.998 to 0.999)        | <0.001           |
| Albuminuria                                               | 0.810 (0.793 to 0.827)        | <0.001           |
| Smoking (yes vs. no)                                      | 1.024 (0.996 to 1.052)        | 0.09             |
| Tablet diabetes treatment only (vs. diet treatment only)  | 1.036 (1.010 to 1.063)        | 0.006            |
| Insulin diabetes treatment only (vs. diet treatment only) | 1.219 (1.169 to 1.272)        | <0.001           |
| Tablet & insulin treatment (vs. diet treatment only)      | 0.995 (0.956 to 1.036)        | 0.81             |
| <b>Triple therapy</b>                                     | <b>1.129 (1.100 to 1.160)</b> | <b>&lt;0.001</b> |

The likelihood to reach target blood pressure increased by 13 % in the most active care units.

The following alternative covariates were tested as measure of care unit antihypertensive activity: Triple therapy, calcium antagonists,  $\beta$ -blockers, loop-diuretics, thiazide diuretics, renin-angiotensin system inhibitor, angiotensin II blocker, fixed pill combination of renin-angiotensin system inhibitor or angiotensin II blocker (RAAS blocking agent), proportion high-dose felodipine users, proportion high-dose amlodipine users, other antihypertensive drugs, and spironolactone.

### Conclusion/interpretation

As a covariate of treatment intensity at the care unit, the percentage of patients receiving a combination of a thiazide diuretic, calcium antagonist and either a renin-angiotensin system inhibitor or angiotensin II blocker (triple therapy) was used.
